# Supplementary material for: Integrated Profiling of MicroRNAs and mRNAs: MicroRNAs Located on Xq27.3 Associate with Clear Cell Renal Cell Carcinoma
Source: PLoS One. 2010 Dec 30;5(12):e15224. doi: 10.1371/journal.pone.0015224 (PMC3013074; doi:10.1371/journal.pone.0015224)
Supplement: Table S7 — Pathway enrichment analysis of genes targeted by differentially expressed miRNAs in ccRCC. (XLS) [file pone.0015224.s009.xls]

## Sheet: Table
Table S7. Pathway enrichment analysis of genes targeted by differentially expressed miRNAs in ccRCC
KEGG pathway	Number of target genes	% Target genes	P-value	P-value adjusted with Benjamini-Hochberg	Number of deregulated miRNAs	Deregulated miRNAs	Relation ship between target genes and miRNAsa
Pathways in cancer	60	18.2927	5.07581e-13	5.12657e-11	45	hsa-let-7a, hsa-let-7b, hsa-miR-1, hsa-miR-106a, hsa-miR-106b, hsa-miR-124, hsa-miR-125a-5p, hsa-miR-125b, hsa-miR-126, hsa-miR-128, hsa-miR-133a, hsa-miR-135a, hsa-miR-135b, hsa-miR-143, hsa-miR-146a, hsa-miR-150, hsa-miR-155, hsa-miR-15a, hsa-miR-15b, hsa-miR-16, hsa-miR-17, hsa-miR-182, hsa-miR-183, hsa-miR-193a-3p, hsa-miR-195, hsa-miR-199b-5p, hsa-miR-19a, hsa-miR-203, hsa-miR-20b, hsa-miR-2…	ABL1<-hsa-miR-203, APC<-hsa-miR-135a_hsa-miR-135b, BCL2<-hsa-miR-15a_hsa-miR-16_hsa-miR-34a_hsa-miR-15b, BRCA2<-hsa-miR-146a, CASP9<-hsa-miR-133a, CCND1<-hsa-let-7b_hsa-miR-195_hsa-miR-424_hsa-miR-16_hsa-miR-34a, CCNE1<-hsa-miR-424_hsa-miR-16_hsa-miR-150_hsa-miR-15b, CDC42<-hsa-miR-29b, CDK4<-hsa-miR-124, CDK6<-hsa-miR-124_hsa-miR-30a*_hsa-let-7b_hsa-miR-21_hsa-miR-16_hsa-miR-424_hsa-miR-34a, CDK…
Pancreatic cancer	22	31.4286	5.81901e-10	2.9386e-08	24	hsa-let-7a, hsa-let-7b, hsa-miR-1, hsa-miR-106a, hsa-miR-106b, hsa-miR-124, hsa-miR-125a-5p, hsa-miR-125b, hsa-miR-126, hsa-miR-128, hsa-miR-133a, hsa-miR-143, hsa-miR-146a, hsa-miR-16, hsa-miR-17, hsa-miR-195, hsa-miR-21, hsa-miR-26a, hsa-miR-29b, hsa-miR-30a*, hsa-miR-34a, hsa-miR-424, hsa-miR-7, hsa-miR-93	BRCA2<-hsa-miR-146a, CASP9<-hsa-miR-133a, CCND1<-hsa-let-7b_hsa-miR-195_hsa-miR-424_hsa-miR-16_hsa-miR-34a, CDC42<-hsa-miR-29b, CDK4<-hsa-miR-124, CDK6<-hsa-miR-124_hsa-miR-30a*_hsa-let-7b_hsa-miR-21_hsa-miR-16_hsa-miR-424_hsa-miR-34a, E2F1<-hsa-miR-106b_hsa-miR-93, E2F3<-hsa-miR-34a_hsa-miR-128, EGFR<-hsa-miR-7_hsa-miR-16_hsa-miR-1, ERBB2<-hsa-miR-125a-5p_hsa-miR-125b, KRAS<-hsa-let-7a_hsa-miR-1…
Bladder cancer	16	38.0952	5.84107e-09	1.47487e-07	21	hsa-let-7a, hsa-let-7b, hsa-miR-1, hsa-miR-106a, hsa-miR-106b, hsa-miR-124, hsa-miR-125a-5p, hsa-miR-125b, hsa-miR-126, hsa-miR-128, hsa-miR-143, hsa-miR-16, hsa-miR-195, hsa-miR-20b, hsa-miR-21, hsa-miR-30a*, hsa-miR-34a, hsa-miR-372, hsa-miR-424, hsa-miR-7, hsa-miR-93	CCND1<-hsa-let-7b_hsa-miR-195_hsa-miR-424_hsa-miR-16_hsa-miR-34a, CDK4<-hsa-miR-124, CDKN1A<-hsa-miR-21_hsa-miR-106a_hsa-miR-106b_hsa-miR-20b_hsa-miR-372, E2F1<-hsa-miR-106b_hsa-miR-93, E2F3<-hsa-miR-34a_hsa-miR-128, EGFR<-hsa-miR-7_hsa-miR-16_hsa-miR-1, ERBB2<-hsa-miR-125a-5p_hsa-miR-125b, KRAS<-hsa-let-7a_hsa-miR-143, NRAS<-hsa-let-7a, PGF<-hsa-miR-124, RAF1<-hsa-miR-7, RB1<-hsa-miR-106a, THBS1…
Small cell lung cancer	23	27.381	4.83176e-09	1.62669e-07	24	hsa-let-7b, hsa-miR-106a, hsa-miR-106b, hsa-miR-124, hsa-miR-128, hsa-miR-133a, hsa-miR-146a, hsa-miR-150, hsa-miR-15a, hsa-miR-15b, hsa-miR-16, hsa-miR-193a-3p, hsa-miR-195, hsa-miR-199b-5p, hsa-miR-19a, hsa-miR-21, hsa-miR-214, hsa-miR-218, hsa-miR-222, hsa-miR-29b, hsa-miR-30a*, hsa-miR-34a, hsa-miR-424, hsa-miR-93	APAF1<-hsa-miR-21, BCL2<-hsa-miR-15a_hsa-miR-16_hsa-miR-34a_hsa-miR-15b, CASP9<-hsa-miR-133a, CCND1<-hsa-let-7b_hsa-miR-195_hsa-miR-424_hsa-miR-16_hsa-miR-34a, CCNE1<-hsa-miR-424_hsa-miR-16_hsa-miR-150_hsa-miR-15b, CDK4<-hsa-miR-124, CDK6<-hsa-miR-124_hsa-miR-30a*_hsa-let-7b_hsa-miR-21_hsa-miR-16_hsa-miR-424_hsa-miR-34a, CDKN1B<-hsa-miR-222, E2F1<-hsa-miR-106b_hsa-miR-93, E2F3<-hsa-miR-34a_hsa-mi…
Prostate cancer	23	25.8427	1.62712e-08	3.28678e-07	29	hsa-let-7a, hsa-let-7b, hsa-miR-1, hsa-miR-106a, hsa-miR-106b, hsa-miR-124, hsa-miR-125a-5p, hsa-miR-125b, hsa-miR-128, hsa-miR-133a, hsa-miR-143, hsa-miR-150, hsa-miR-155, hsa-miR-15a, hsa-miR-15b, hsa-miR-16, hsa-miR-195, hsa-miR-19a, hsa-miR-20b, hsa-miR-21, hsa-miR-214, hsa-miR-222, hsa-miR-29b, hsa-miR-34a, hsa-miR-34b*, hsa-miR-372, hsa-miR-424, hsa-miR-7, hsa-miR-93	BCL2<-hsa-miR-15a_hsa-miR-16_hsa-miR-34a_hsa-miR-15b, CASP9<-hsa-miR-133a, CCND1<-hsa-let-7b_hsa-miR-195_hsa-miR-424_hsa-miR-16_hsa-miR-34a, CCNE1<-hsa-miR-424_hsa-miR-16_hsa-miR-150_hsa-miR-15b, CDKN1A<-hsa-miR-21_hsa-miR-106a_hsa-miR-106b_hsa-miR-20b_hsa-miR-372, CDKN1B<-hsa-miR-222, CREB1<-hsa-miR-34b*, CREB3L2<-hsa-miR-124, CTNNB1<-hsa-miR-155, E2F1<-hsa-miR-106b_hsa-miR-93, E2F3<-hsa-miR-34a…
Melanoma	19	26.7606	1.62904e-07	2.74221e-06	25	hsa-let-7a, hsa-let-7b, hsa-miR-1, hsa-miR-106a, hsa-miR-106b, hsa-miR-124, hsa-miR-128, hsa-miR-143, hsa-miR-155, hsa-miR-16, hsa-miR-182, hsa-miR-195, hsa-miR-19a, hsa-miR-20b, hsa-miR-21, hsa-miR-214, hsa-miR-29b, hsa-miR-30a*, hsa-miR-34a, hsa-miR-372, hsa-miR-424, hsa-miR-433, hsa-miR-7, hsa-miR-93, hsa-miR-96	CCND1<-hsa-let-7b_hsa-miR-195_hsa-miR-424_hsa-miR-16_hsa-miR-34a, CDK4<-hsa-miR-124, CDK6<-hsa-miR-124_hsa-miR-30a*_hsa-let-7b_hsa-miR-21_hsa-miR-16_hsa-miR-424_hsa-miR-34a, CDKN1A<-hsa-miR-21_hsa-miR-106a_hsa-miR-106b_hsa-miR-20b_hsa-miR-372, E2F1<-hsa-miR-106b_hsa-miR-93, E2F3<-hsa-miR-34a_hsa-miR-128, EGFR<-hsa-miR-7_hsa-miR-16_hsa-miR-1, FGF2<-hsa-miR-16, FGF20<-hsa-miR-433, IGF1<-hsa-miR-1, …
Chronic myeloid leukemia	19	26.0274	2.63128e-07	3.79656e-06	21	hsa-let-7a, hsa-let-7b, hsa-miR-106a, hsa-miR-106b, hsa-miR-124, hsa-miR-128, hsa-miR-143, hsa-miR-16, hsa-miR-195, hsa-miR-203, hsa-miR-20b, hsa-miR-21, hsa-miR-222, hsa-miR-26a, hsa-miR-29b, hsa-miR-30a*, hsa-miR-34a, hsa-miR-372, hsa-miR-424, hsa-miR-7, hsa-miR-93	ABL1<-hsa-miR-203, CCND1<-hsa-let-7b_hsa-miR-195_hsa-miR-424_hsa-miR-16_hsa-miR-34a, CDK4<-hsa-miR-124, CDK6<-hsa-miR-124_hsa-miR-30a*_hsa-let-7b_hsa-miR-21_hsa-miR-16_hsa-miR-424_hsa-miR-34a, CDKN1A<-hsa-miR-21_hsa-miR-106a_hsa-miR-106b_hsa-miR-20b_hsa-miR-372, CDKN1B<-hsa-miR-222, E2F1<-hsa-miR-106b_hsa-miR-93, E2F3<-hsa-miR-34a_hsa-miR-128, KRAS<-hsa-let-7a_hsa-miR-143, NRAS<-hsa-let-7a, PIK3R…
Non-small cell lung cancer	15	27.7778	2.00579e-06	2.53232e-05	20	hsa-let-7a, hsa-let-7b, hsa-miR-1, hsa-miR-106a, hsa-miR-106b, hsa-miR-124, hsa-miR-125a-5p, hsa-miR-125b, hsa-miR-128, hsa-miR-133a, hsa-miR-143, hsa-miR-16, hsa-miR-195, hsa-miR-21, hsa-miR-29b, hsa-miR-30a*, hsa-miR-34a, hsa-miR-424, hsa-miR-7, hsa-miR-93	CASP9<-hsa-miR-133a, CCND1<-hsa-let-7b_hsa-miR-195_hsa-miR-424_hsa-miR-16_hsa-miR-34a, CDK4<-hsa-miR-124, CDK6<-hsa-miR-124_hsa-miR-30a*_hsa-let-7b_hsa-miR-21_hsa-miR-16_hsa-miR-424_hsa-miR-34a, E2F1<-hsa-miR-106b_hsa-miR-93, E2F3<-hsa-miR-34a_hsa-miR-128, EGFR<-hsa-miR-7_hsa-miR-16_hsa-miR-1, ERBB2<-hsa-miR-125a-5p_hsa-miR-125b, KRAS<-hsa-let-7a_hsa-miR-143, NRAS<-hsa-let-7a, PIK3R1<-hsa-miR-29b…
Neurotrophin signaling pathway	24	19.0476	3.53983e-06	3.97248e-05	17	hsa-let-7a, hsa-miR-1, hsa-miR-124, hsa-miR-126, hsa-miR-143, hsa-miR-145, hsa-miR-146a, hsa-miR-155, hsa-miR-15a, hsa-miR-15b, hsa-miR-16, hsa-miR-17, hsa-miR-203, hsa-miR-29b, hsa-miR-30a, hsa-miR-34a, hsa-miR-7	ABL1<-hsa-miR-203, ARHGDIA<-hsa-miR-16, BCL2<-hsa-miR-15a_hsa-miR-16_hsa-miR-34a_hsa-miR-15b, BDNF<-hsa-miR-1_hsa-miR-30a, CDC42<-hsa-miR-29b, GAB1<-hsa-miR-17, IRAK1<-hsa-miR-146a, IRS1<-hsa-miR-145_hsa-miR-7_hsa-miR-126, IRS2<-hsa-miR-7, JUN<-hsa-miR-15a_hsa-miR-16, KRAS<-hsa-let-7a_hsa-miR-143, MAPK12<-hsa-miR-143, MAPK14<-hsa-miR-124, MAPK7<-hsa-miR-143, MAPK9<-hsa-miR-17, NRAS<-hsa-let-7a, P…
Cell cycle	24	18.75	4.72354e-06	4.77077e-05	22	hsa-let-7b, hsa-miR-1, hsa-miR-106a, hsa-miR-106b, hsa-miR-124, hsa-miR-128, hsa-miR-150, hsa-miR-15a, hsa-miR-15b, hsa-miR-16, hsa-miR-17, hsa-miR-195, hsa-miR-203, hsa-miR-20b, hsa-miR-21, hsa-miR-222, hsa-miR-30a*, hsa-miR-34a, hsa-miR-372, hsa-miR-376a*, hsa-miR-424, hsa-miR-93	ABL1<-hsa-miR-203, ANAPC1<-hsa-let-7b, CCND1<-hsa-let-7b_hsa-miR-195_hsa-miR-424_hsa-miR-16_hsa-miR-34a, CCND3<-hsa-miR-424_hsa-miR-16, CCNE1<-hsa-miR-424_hsa-miR-16_hsa-miR-150_hsa-miR-15b, CDC14B<-hsa-miR-124_hsa-miR-16_hsa-miR-15a, CDC25A<-hsa-let-7b, CDK4<-hsa-miR-124, CDK6<-hsa-miR-124_hsa-miR-30a*_hsa-let-7b_hsa-miR-21_hsa-miR-16_hsa-miR-424_hsa-miR-34a, CDKN1A<-hsa-miR-21_hsa-miR-106a_hsa-…
Colorectal cancer	15	24.1935	1.29551e-05	0.000109039	18	hsa-let-7a, hsa-let-7b, hsa-miR-133a, hsa-miR-135a, hsa-miR-135b, hsa-miR-143, hsa-miR-155, hsa-miR-15a, hsa-miR-15b, hsa-miR-16, hsa-miR-17, hsa-miR-195, hsa-miR-21, hsa-miR-26a, hsa-miR-29b, hsa-miR-34a, hsa-miR-424, hsa-miR-7	APC<-hsa-miR-135a_hsa-miR-135b, BCL2<-hsa-miR-15a_hsa-miR-16_hsa-miR-34a_hsa-miR-15b, CASP9<-hsa-miR-133a, CCND1<-hsa-let-7b_hsa-miR-195_hsa-miR-424_hsa-miR-16_hsa-miR-34a, CTNNB1<-hsa-miR-155, JUN<-hsa-miR-15a_hsa-miR-16, KRAS<-hsa-let-7a_hsa-miR-143, MAPK9<-hsa-miR-17, MSH2<-hsa-miR-15a_hsa-miR-16, PIK3R1<-hsa-miR-29b, RAF1<-hsa-miR-7, RHOA<-hsa-miR-155, TGFB1<-hsa-miR-21, TGFBR2<-hsa-miR-26a_h…
p53 signaling pathway	16	23.1884	1.19462e-05	0.000109688	19	hsa-let-7b, hsa-miR-1, hsa-miR-106a, hsa-miR-106b, hsa-miR-124, hsa-miR-125b, hsa-miR-133a, hsa-miR-150, hsa-miR-15b, hsa-miR-16, hsa-miR-195, hsa-miR-19a, hsa-miR-20b, hsa-miR-21, hsa-miR-214, hsa-miR-30a*, hsa-miR-34a, hsa-miR-372, hsa-miR-424	APAF1<-hsa-miR-21, CASP9<-hsa-miR-133a, CCND1<-hsa-let-7b_hsa-miR-195_hsa-miR-424_hsa-miR-16_hsa-miR-34a, CCND3<-hsa-miR-424_hsa-miR-16, CCNE1<-hsa-miR-424_hsa-miR-16_hsa-miR-150_hsa-miR-15b, CDK4<-hsa-miR-124, CDK6<-hsa-miR-124_hsa-miR-30a*_hsa-let-7b_hsa-miR-21_hsa-miR-16_hsa-miR-424_hsa-miR-34a, CDKN1A<-hsa-miR-21_hsa-miR-106a_hsa-miR-106b_hsa-miR-20b_hsa-miR-372, FAS<-hsa-miR-21, IGF1<-hsa-mi…
Glioma	15	23.0769	2.38538e-05	0.000185326	21	hsa-let-7a, hsa-let-7b, hsa-miR-1, hsa-miR-106a, hsa-miR-106b, hsa-miR-124, hsa-miR-128, hsa-miR-143, hsa-miR-16, hsa-miR-195, hsa-miR-19a, hsa-miR-20b, hsa-miR-21, hsa-miR-214, hsa-miR-29b, hsa-miR-30a*, hsa-miR-34a, hsa-miR-372, hsa-miR-424, hsa-miR-7, hsa-miR-93	CCND1<-hsa-let-7b_hsa-miR-195_hsa-miR-424_hsa-miR-16_hsa-miR-34a, CDK4<-hsa-miR-124, CDK6<-hsa-miR-124_hsa-miR-30a*_hsa-let-7b_hsa-miR-21_hsa-miR-16_hsa-miR-424_hsa-miR-34a, CDKN1A<-hsa-miR-21_hsa-miR-106a_hsa-miR-106b_hsa-miR-20b_hsa-miR-372, E2F1<-hsa-miR-106b_hsa-miR-93, E2F3<-hsa-miR-34a_hsa-miR-128, EGFR<-hsa-miR-7_hsa-miR-16_hsa-miR-1, IGF1<-hsa-miR-1, KRAS<-hsa-let-7a_hsa-miR-143, NRAS<-hs…
Epithelial cell signaling in Helicobacter pylori infection	15	22.0588	4.21677e-05	0.00030421	11	hsa-let-7b, hsa-miR-1, hsa-miR-124, hsa-miR-143, hsa-miR-155, hsa-miR-15a, hsa-miR-16, hsa-miR-17, hsa-miR-29b, hsa-miR-377, hsa-miR-7	ATP6V0A1<-hsa-let-7b_hsa-miR-1, ATP6V1C1<-hsa-miR-155, ATP6V1F<-hsa-let-7b, CDC42<-hsa-miR-29b, EGFR<-hsa-miR-7_hsa-miR-16_hsa-miR-1, F11R<-hsa-miR-124, JUN<-hsa-miR-15a_hsa-miR-16, MAPK12<-hsa-miR-143, MAPK14<-hsa-miR-124, MAPK9<-hsa-miR-17, MET<-hsa-miR-1_hsa-miR-155, PAK1<-hsa-miR-377_hsa-miR-7, RELA<-hsa-miR-124
Focal adhesion	29	14.4279	9.3862e-05	0.000632004	24	hsa-let-7b, hsa-miR-1, hsa-miR-124, hsa-miR-125a-5p, hsa-miR-125b, hsa-miR-126, hsa-miR-155, hsa-miR-15a, hsa-miR-15b, hsa-miR-16, hsa-miR-17, hsa-miR-193a-3p, hsa-miR-195, hsa-miR-199b-5p, hsa-miR-19a, hsa-miR-21, hsa-miR-214, hsa-miR-218, hsa-miR-29b, hsa-miR-30a*, hsa-miR-34a, hsa-miR-377, hsa-miR-424, hsa-miR-7	ACTG1<-hsa-let-7b, BCL2<-hsa-miR-15a_hsa-miR-16_hsa-miR-34a_hsa-miR-15b, CAV1<-hsa-miR-124, CCND1<-hsa-let-7b_hsa-miR-195_hsa-miR-424_hsa-miR-16_hsa-miR-34a, CCND3<-hsa-miR-424_hsa-miR-16, CDC42<-hsa-miR-29b, CTNNB1<-hsa-miR-155, EGFR<-hsa-miR-7_hsa-miR-16_hsa-miR-1, ERBB2<-hsa-miR-125a-5p_hsa-miR-125b, IGF1<-hsa-miR-1, ITGA2<-hsa-miR-16, ITGB1<-hsa-miR-124, ITGB4<-hsa-miR-1, JUN<-hsa-miR-15a_hsa…
T cell receptor signaling pathway	19	17.5926	0.000115737	0.000730592	13	hsa-let-7a, hsa-miR-101, hsa-miR-124, hsa-miR-143, hsa-miR-155, hsa-miR-15a, hsa-miR-16, hsa-miR-17, hsa-miR-21, hsa-miR-29b, hsa-miR-370, hsa-miR-377, hsa-miR-7	CDC42<-hsa-miR-29b, CDK4<-hsa-miR-124, CHP<-hsa-miR-124, ICOS<-hsa-miR-101, JUN<-hsa-miR-15a_hsa-miR-16, KRAS<-hsa-let-7a_hsa-miR-143, MAP3K8<-hsa-miR-370, MAPK12<-hsa-miR-143, MAPK14<-hsa-miR-124, MAPK9<-hsa-miR-17, NFATC1<-hsa-miR-124, NRAS<-hsa-let-7a, PAK1<-hsa-miR-377_hsa-miR-7, PIK3R1<-hsa-miR-29b, RAF1<-hsa-miR-7, RASGRP1<-hsa-miR-21, RELA<-hsa-miR-124, RHOA<-hsa-miR-155
Pathogenic Escherichia coli infection	13	22.0339	0.000138616	0.000823543	7	hsa-let-7b, hsa-let-7i, hsa-miR-1, hsa-miR-124, hsa-miR-155, hsa-miR-203, hsa-miR-29b	ABL1<-hsa-miR-203, ACTG1<-hsa-let-7b, ARPC1B<-hsa-miR-124, CDC42<-hsa-miR-29b, CLDN1<-hsa-miR-155, CTNNB1<-hsa-miR-155, ITGB1<-hsa-miR-124, RHOA<-hsa-miR-155, TLR4<-hsa-let-7i, YWHAQ<-hsa-miR-1
Endometrial cancer	12	23.0769	0.00015657	0.000878534	19	hsa-let-7a, hsa-let-7b, hsa-miR-1, hsa-miR-125a-5p, hsa-miR-125b, hsa-miR-133a, hsa-miR-135a, hsa-miR-135b, hsa-miR-143, hsa-miR-155, hsa-miR-16, hsa-miR-195, hsa-miR-19a, hsa-miR-21, hsa-miR-214, hsa-miR-29b, hsa-miR-34a, hsa-miR-424, hsa-miR-7	APC<-hsa-miR-135a_hsa-miR-135b, CASP9<-hsa-miR-133a, CCND1<-hsa-let-7b_hsa-miR-195_hsa-miR-424_hsa-miR-16_hsa-miR-34a, CTNNB1<-hsa-miR-155, EGFR<-hsa-miR-7_hsa-miR-16_hsa-miR-1, ERBB2<-hsa-miR-125a-5p_hsa-miR-125b, KRAS<-hsa-let-7a_hsa-miR-143, NRAS<-hsa-let-7a, PIK3R1<-hsa-miR-29b, PTEN<-hsa-miR-19a_hsa-miR-214_hsa-miR-21, RAF1<-hsa-miR-7
Acute myeloid leukemia	13	21.6667	0.000166141	0.000883173	13	hsa-let-7a, hsa-let-7b, hsa-miR-1, hsa-miR-124, hsa-miR-143, hsa-miR-16, hsa-miR-183, hsa-miR-195, hsa-miR-222, hsa-miR-29b, hsa-miR-34a, hsa-miR-424, hsa-miR-7	CCND1<-hsa-let-7b_hsa-miR-195_hsa-miR-424_hsa-miR-16_hsa-miR-34a, CEBPA<-hsa-miR-124, KIT<-hsa-miR-222, KRAS<-hsa-let-7a_hsa-miR-143, NRAS<-hsa-let-7a, PIK3R1<-hsa-miR-29b, PIM1<-hsa-miR-1, RAF1<-hsa-miR-7, RELA<-hsa-miR-124, RUNX1T1<-hsa-miR-183
ErbB signaling pathway	16	18.3908	0.000235048	0.00113047	19	hsa-let-7a, hsa-miR-1, hsa-miR-106a, hsa-miR-106b, hsa-miR-125a-5p, hsa-miR-125b, hsa-miR-143, hsa-miR-15a, hsa-miR-16, hsa-miR-17, hsa-miR-193a-3p, hsa-miR-203, hsa-miR-20b, hsa-miR-21, hsa-miR-222, hsa-miR-29b, hsa-miR-372, hsa-miR-377, hsa-miR-7	ABL1<-hsa-miR-203, CDKN1A<-hsa-miR-21_hsa-miR-106a_hsa-miR-106b_hsa-miR-20b_hsa-miR-372, CDKN1B<-hsa-miR-222, EGFR<-hsa-miR-7_hsa-miR-16_hsa-miR-1, ERBB2<-hsa-miR-125a-5p_hsa-miR-125b, ERBB3<-hsa-miR-125a-5p_hsa-miR-125b, GAB1<-hsa-miR-17, JUN<-hsa-miR-15a_hsa-miR-16, KRAS<-hsa-let-7a_hsa-miR-143, MAPK9<-hsa-miR-17, NRAS<-hsa-let-7a, PAK1<-hsa-miR-377_hsa-miR-7, PIK3R1<-hsa-miR-29b, PTK2<-hsa-miR…
Progesterone-mediated oocyte maturation	16	18.3908	0.000235048	0.00113047	12	hsa-let-7a, hsa-let-7b, hsa-miR-1, hsa-miR-124, hsa-miR-143, hsa-miR-155, hsa-miR-16, hsa-miR-17, hsa-miR-182, hsa-miR-29b, hsa-miR-7, hsa-miR-96	ADCY6<-hsa-miR-96_hsa-miR-182, ANAPC1<-hsa-let-7b, CDC25A<-hsa-let-7b, GNAI3<-hsa-miR-124, IGF1<-hsa-miR-1, KRAS<-hsa-let-7a_hsa-miR-143, MAD2L2<-hsa-miR-124, MAPK12<-hsa-miR-143, MAPK14<-hsa-miR-124, MAPK9<-hsa-miR-17, PDE3A<-hsa-miR-155, PIK3R1<-hsa-miR-29b, PLK1<-hsa-miR-16, RAF1<-hsa-miR-7
Renal cell carcinoma	14	20	0.000231271	0.00116792	13	hsa-let-7a, hsa-miR-1, hsa-miR-124, hsa-miR-126, hsa-miR-143, hsa-miR-155, hsa-miR-15a, hsa-miR-16, hsa-miR-17, hsa-miR-21, hsa-miR-29b, hsa-miR-377, hsa-miR-7	CDC42<-hsa-miR-29b, ETS1<-hsa-miR-155, GAB1<-hsa-miR-17, JUN<-hsa-miR-15a_hsa-miR-16, KRAS<-hsa-let-7a_hsa-miR-143, MET<-hsa-miR-1_hsa-miR-155, NRAS<-hsa-let-7a, PAK1<-hsa-miR-377_hsa-miR-7, PGF<-hsa-miR-124, PIK3R1<-hsa-miR-29b, RAF1<-hsa-miR-7, TGFB1<-hsa-miR-21, VEGFA<-hsa-miR-126
Bacterial invasion of epithelial cells	14	19.1781	0.000366049	0.0016805	7	hsa-let-7b, hsa-miR-1, hsa-miR-124, hsa-miR-155, hsa-miR-17, hsa-miR-193a-3p, hsa-miR-29b	ACTG1<-hsa-let-7b, ARPC1B<-hsa-miR-124, CAV1<-hsa-miR-124, CDC42<-hsa-miR-29b, CTNNB1<-hsa-miR-155, DNM2<-hsa-miR-124, GAB1<-hsa-miR-17, ITGB1<-hsa-miR-124, MAD2L2<-hsa-miR-124, MET<-hsa-miR-1_hsa-miR-155, PIK3R1<-hsa-miR-29b, PTK2<-hsa-miR-193a-3p, RHOA<-hsa-miR-155, RHOG<-hsa-miR-124_hsa-let-7b
Regulation of actin cytoskeleton	28	12.963	0.000754157	0.00331173	15	hsa-let-7a, hsa-let-7b, hsa-miR-1, hsa-miR-124, hsa-miR-135a, hsa-miR-135b, hsa-miR-143, hsa-miR-155, hsa-miR-16, hsa-miR-193a-3p, hsa-miR-21, hsa-miR-29b, hsa-miR-377, hsa-miR-433, hsa-miR-7	ACTG1<-hsa-let-7b, APC<-hsa-miR-135a_hsa-miR-135b, ARHGEF1<-hsa-miR-124, ARPC1B<-hsa-miR-124, CDC42<-hsa-miR-29b, CFL2<-hsa-miR-21_hsa-miR-16, EGFR<-hsa-miR-7_hsa-miR-16_hsa-miR-1, F2<-hsa-let-7b_hsa-miR-155_hsa-miR-16_hsa-miR-1, FGF2<-hsa-miR-16, FGF20<-hsa-miR-433, GNA13<-hsa-miR-155, GSN<-hsa-miR-124, IQGAP1<-hsa-miR-124, IQGAP3<-hsa-miR-1, ITGA2<-hsa-miR-16, ITGB1<-hsa-miR-124, ITGB4<-hsa-miR…
Leukocyte transendothelial migration	18	15.2542	0.00104645	0.00440382	9	hsa-let-7b, hsa-miR-124, hsa-miR-126, hsa-miR-143, hsa-miR-146a, hsa-miR-155, hsa-miR-193a-3p, hsa-miR-23a, hsa-miR-29b	ACTG1<-hsa-let-7b, CDC42<-hsa-miR-29b, CLDN1<-hsa-miR-155, CTNNB1<-hsa-miR-155, CTNND1<-hsa-miR-124, CXCL12<-hsa-miR-23a, CXCR4<-hsa-miR-146a, F11R<-hsa-miR-124, GNAI3<-hsa-miR-124, ITGB1<-hsa-miR-124, MAPK12<-hsa-miR-143, MAPK14<-hsa-miR-124, PIK3R1<-hsa-miR-29b, PTK2<-hsa-miR-193a-3p, RASSF5<-hsa-miR-124, RHOA<-hsa-miR-155, VCAM1<-hsa-miR-126
Shigellosis	12	18.75	0.00117486	0.00474642	6	hsa-let-7b, hsa-miR-124, hsa-miR-143, hsa-miR-17, hsa-miR-203, hsa-miR-29b	ABL1<-hsa-miR-203, ACTG1<-hsa-let-7b, ARPC1B<-hsa-miR-124, CDC42<-hsa-miR-29b, ITGB1<-hsa-miR-124, MAD2L2<-hsa-miR-124, MAPK12<-hsa-miR-143, MAPK14<-hsa-miR-124, MAPK9<-hsa-miR-17, RELA<-hsa-miR-124, RHOG<-hsa-miR-124_hsa-let-7b
MAPK signaling pathway	32	11.985	0.00126337	0.00490772	18	hsa-let-7a, hsa-miR-1, hsa-miR-124, hsa-miR-141, hsa-miR-143, hsa-miR-146a, hsa-miR-155, hsa-miR-15a, hsa-miR-16, hsa-miR-17, hsa-miR-21, hsa-miR-26a, hsa-miR-29b, hsa-miR-30a, hsa-miR-370, hsa-miR-377, hsa-miR-433, hsa-miR-7	BDNF<-hsa-miR-1_hsa-miR-30a, CACNA2D1<-hsa-miR-16, CDC42<-hsa-miR-29b, CHP<-hsa-miR-124, DAXX<-hsa-miR-21, EGFR<-hsa-miR-7_hsa-miR-16_hsa-miR-1, FAS<-hsa-miR-21, FGF2<-hsa-miR-16, FGF20<-hsa-miR-433, HSPA1A<-hsa-miR-15a_hsa-miR-16, HSPA1B<-hsa-miR-16, JUN<-hsa-miR-15a_hsa-miR-16, KRAS<-hsa-let-7a_hsa-miR-143, MAP3K8<-hsa-miR-370, MAPK12<-hsa-miR-143, MAPK14<-hsa-miR-124, MAPK7<-hsa-miR-143, MAPK9…
Adherens junction	13	17.3333	0.00158513	0.00592958	11	hsa-let-7b, hsa-miR-1, hsa-miR-124, hsa-miR-125a-5p, hsa-miR-125b, hsa-miR-155, hsa-miR-16, hsa-miR-21, hsa-miR-26a, hsa-miR-29b, hsa-miR-7	ACTG1<-hsa-let-7b, CDC42<-hsa-miR-29b, CTNNB1<-hsa-miR-155, CTNND1<-hsa-miR-124, EGFR<-hsa-miR-7_hsa-miR-16_hsa-miR-1, ERBB2<-hsa-miR-125a-5p_hsa-miR-125b, IQGAP1<-hsa-miR-124, MET<-hsa-miR-1_hsa-miR-155, PTPRF<-hsa-miR-1, PTPRJ<-hsa-miR-155, RHOA<-hsa-miR-155, SNAI2<-hsa-miR-124, TGFBR2<-hsa-miR-26a_hsa-miR-21
VEGF signaling pathway	13	17.1053	0.00179605	0.00647861	10	hsa-let-7a, hsa-let-7b, hsa-miR-124, hsa-miR-126, hsa-miR-133a, hsa-miR-143, hsa-miR-16, hsa-miR-193a-3p, hsa-miR-29b, hsa-miR-7	CASP9<-hsa-miR-133a, CDC42<-hsa-miR-29b, CHP<-hsa-miR-124, KRAS<-hsa-let-7a_hsa-miR-143, MAPK12<-hsa-miR-143, MAPK14<-hsa-miR-124, NFATC1<-hsa-miR-124, NRAS<-hsa-let-7a, PIK3R1<-hsa-miR-29b, PTGS2<-hsa-let-7b_hsa-miR-16, PTK2<-hsa-miR-193a-3p, RAF1<-hsa-miR-7, VEGFA<-hsa-miR-126
Apoptosis	14	15.9091	0.00247485	0.0086193	11	hsa-miR-124, hsa-miR-125b, hsa-miR-133a, hsa-miR-146a, hsa-miR-155, hsa-miR-15a, hsa-miR-15b, hsa-miR-16, hsa-miR-21, hsa-miR-29b, hsa-miR-34a	APAF1<-hsa-miR-21, BCL2<-hsa-miR-15a_hsa-miR-16_hsa-miR-34a_hsa-miR-15b, CASP6<-hsa-miR-125b, CASP7<-hsa-miR-125b, CASP9<-hsa-miR-133a, CHP<-hsa-miR-124, DFFB<-hsa-miR-124, FAS<-hsa-miR-21, IRAK1<-hsa-miR-146a, PIK3R1<-hsa-miR-29b, RELA<-hsa-miR-124, TNFRSF10A<-hsa-miR-155
Axon guidance	18	13.9535	0.00292346	0.00984232	15	hsa-let-7a, hsa-miR-1, hsa-miR-124, hsa-miR-143, hsa-miR-146a, hsa-miR-155, hsa-miR-16, hsa-miR-193a-3p, hsa-miR-203, hsa-miR-21, hsa-miR-210, hsa-miR-23a, hsa-miR-29b, hsa-miR-377, hsa-miR-7	ABL1<-hsa-miR-203, CDC42<-hsa-miR-29b, CFL2<-hsa-miR-21_hsa-miR-16, CHP<-hsa-miR-124, CXCL12<-hsa-miR-23a, CXCR4<-hsa-miR-146a, EFNA3<-hsa-miR-210, GNAI3<-hsa-miR-124, ITGB1<-hsa-miR-124, KRAS<-hsa-let-7a_hsa-miR-143, MET<-hsa-miR-1_hsa-miR-155, NFATC1<-hsa-miR-124, NRAS<-hsa-let-7a, NRP1<-hsa-miR-1, PAK1<-hsa-miR-377_hsa-miR-7, PTK2<-hsa-miR-193a-3p, RASA1<-hsa-miR-21, RHOA<-hsa-miR-155
Endocytosis	25	12.1951	0.00335526	0.0109317	16	hsa-let-7b, hsa-miR-1, hsa-miR-106b, hsa-miR-124, hsa-miR-125a-5p, hsa-miR-125b, hsa-miR-146a, hsa-miR-155, hsa-miR-15a, hsa-miR-16, hsa-miR-17, hsa-miR-21, hsa-miR-222, hsa-miR-26a, hsa-miR-29b, hsa-miR-7	CAV1<-hsa-miR-124, CDC42<-hsa-miR-29b, CHMP2A<-hsa-let-7b, CXCR4<-hsa-miR-146a, DNM2<-hsa-miR-124, EGFR<-hsa-miR-7_hsa-miR-16_hsa-miR-1, ERBB3<-hsa-miR-125a-5p_hsa-miR-125b, HSPA1A<-hsa-miR-15a_hsa-miR-16, HSPA1B<-hsa-miR-16, ITCH<-hsa-miR-106b, KIT<-hsa-miR-222, MET<-hsa-miR-1_hsa-miR-155, NEDD4<-hsa-let-7b, PDCD6IP<-hsa-miR-15a_hsa-miR-16, PRKCI<-hsa-miR-155, RAB11FIP2<-hsa-miR-1, RAB5C<-hsa-mi…
Leishmaniasis	12	16.2162	0.00420921	0.0132853	9	hsa-let-7b, hsa-let-7i, hsa-miR-124, hsa-miR-143, hsa-miR-146a, hsa-miR-15a, hsa-miR-16, hsa-miR-21, hsa-miR-375	IRAK1<-hsa-miR-146a, ITGB1<-hsa-miR-124, JAK2<-hsa-miR-375, JUN<-hsa-miR-15a_hsa-miR-16, MAPK12<-hsa-miR-143, MAPK14<-hsa-miR-124, PTGS2<-hsa-let-7b_hsa-miR-16, RELA<-hsa-miR-124, TGFB1<-hsa-miR-21, TLR4<-hsa-let-7i, TRAF6<-hsa-miR-146a
TGF-beta signaling pathway	13	15.2941	0.00494879	0.0151463	10	hsa-let-7b, hsa-miR-1, hsa-miR-124, hsa-miR-125b, hsa-miR-155, hsa-miR-17, hsa-miR-21, hsa-miR-26a, hsa-miR-29b, hsa-miR-30a*	BMPR2<-hsa-miR-21, E2F5<-hsa-miR-124, ID1<-hsa-miR-125b, ID2<-hsa-miR-125b, ID3<-hsa-miR-125b, RBL1<-hsa-miR-17, RHOA<-hsa-miR-155, SMAD1<-hsa-miR-26a_hsa-miR-155, SMAD5<-hsa-miR-124, SP1<-hsa-miR-124_hsa-miR-29b, TGFB1<-hsa-miR-21, TGFBR2<-hsa-miR-26a_hsa-miR-21, THBS1<-hsa-miR-30a*_hsa-let-7b_hsa-miR-1
Insulin signaling pathway	18	13.1387	0.00560963	0.0166639	16	hsa-let-7a, hsa-let-7b, hsa-miR-1, hsa-miR-122, hsa-miR-126, hsa-miR-143, hsa-miR-145, hsa-miR-155, hsa-miR-15a, hsa-miR-16, hsa-miR-17, hsa-miR-19a, hsa-miR-19b, hsa-miR-203, hsa-miR-29b, hsa-miR-7	EIF4E<-hsa-miR-16, GYS1<-hsa-miR-122_hsa-let-7b, IRS1<-hsa-miR-145_hsa-miR-7_hsa-miR-126, IRS2<-hsa-miR-7, KRAS<-hsa-let-7a_hsa-miR-143, MAPK9<-hsa-miR-17, NRAS<-hsa-let-7a, PDE3A<-hsa-miR-155, PHKB<-hsa-miR-15a_hsa-miR-16, PIK3R1<-hsa-miR-29b, PRKCI<-hsa-miR-155, PTPRF<-hsa-miR-1, RAF1<-hsa-miR-7, RHEB<-hsa-miR-155, SOCS1<-hsa-miR-19b_hsa-miR-19a, SOCS3<-hsa-miR-203
Purine metabolism	20	12.4224	0.00679415	0.019606	11	hsa-let-7b, hsa-miR-1, hsa-miR-124, hsa-miR-133a, hsa-miR-133b, hsa-miR-155, hsa-miR-15a, hsa-miR-16, hsa-miR-182, hsa-miR-30a, hsa-miR-96	ADCY6<-hsa-miR-96_hsa-miR-182, ADSS<-hsa-miR-16, AK1<-hsa-miR-30a, AK2<-hsa-miR-124, NME4<-hsa-miR-124, NP<-hsa-miR-1_hsa-miR-16, NT5E<-hsa-miR-155, PAPSS2<-hsa-miR-124, PDE3A<-hsa-miR-155, PGM1<-hsa-miR-124, PGM2<-hsa-miR-1, PKM2<-hsa-miR-133a_hsa-miR-133b, POLA2<-hsa-miR-1, POLD2<-hsa-let-7b, POLE3<-hsa-miR-155, POLE4<-hsa-miR-155, POLR2C<-hsa-let-7b, POLR2K<-hsa-miR-1, POLR3G<-hsa-miR-124, PRI…
Pyrimidine metabolism	14	14.1414	0.00733695	0.0205842	6	hsa-let-7b, hsa-miR-1, hsa-miR-124, hsa-miR-155, hsa-miR-15a, hsa-miR-16	DCTD<-hsa-miR-124, NME4<-hsa-miR-124, NP<-hsa-miR-1_hsa-miR-16, NT5E<-hsa-miR-155, POLA2<-hsa-miR-1, POLD2<-hsa-let-7b, POLE3<-hsa-miR-155, POLE4<-hsa-miR-155, POLR2C<-hsa-let-7b, POLR2K<-hsa-miR-1, POLR3G<-hsa-miR-124, PRIM1<-hsa-miR-15a_hsa-miR-16_hsa-let-7b, TXNRD1<-hsa-miR-155, TYMS<-hsa-let-7b
SNARE interactions in vesicular transport	7	19.4444	0.0101009	0.0275727	4	hsa-let-7b, hsa-miR-124, hsa-miR-155, hsa-miR-16	BET1<-hsa-miR-155, SNAP23<-hsa-let-7b, SNAP29<-hsa-miR-155, STX10<-hsa-miR-124, VAMP3<-hsa-miR-124_hsa-miR-155, VTI1B<-hsa-miR-16
Chagas disease	14	13.4615	0.0112339	0.0298585	10	hsa-let-7i, hsa-miR-124, hsa-miR-143, hsa-miR-146a, hsa-miR-15a, hsa-miR-16, hsa-miR-17, hsa-miR-21, hsa-miR-26a, hsa-miR-29b	FAS<-hsa-miR-21, GNAI3<-hsa-miR-124, IRAK1<-hsa-miR-146a, JUN<-hsa-miR-15a_hsa-miR-16, MAPK12<-hsa-miR-143, MAPK14<-hsa-miR-124, MAPK9<-hsa-miR-17, PIK3R1<-hsa-miR-29b, RELA<-hsa-miR-124, TGFB1<-hsa-miR-21, TGFBR2<-hsa-miR-26a_hsa-miR-21, TLR4<-hsa-let-7i, TRAF6<-hsa-miR-146a
Biosynthesis of unsaturated fatty acids	5	23.8095	0.0121837	0.0315526	4	hsa-let-7b, hsa-miR-1, hsa-miR-124, hsa-miR-155	ELOVL5<-hsa-miR-124, FADS1<-hsa-miR-155, FADS2<-hsa-let-7b, HSD17B12<-hsa-miR-155, PTPLB<-hsa-miR-1
Type II diabetes mellitus	8	17.0213	0.0136854	0.0345556	10	hsa-miR-126, hsa-miR-133a, hsa-miR-133b, hsa-miR-145, hsa-miR-17, hsa-miR-19a, hsa-miR-19b, hsa-miR-203, hsa-miR-29b, hsa-miR-7	IRS1<-hsa-miR-145_hsa-miR-7_hsa-miR-126, IRS2<-hsa-miR-7, MAPK9<-hsa-miR-17, PIK3R1<-hsa-miR-29b, PKM2<-hsa-miR-133a_hsa-miR-133b, SOCS1<-hsa-miR-19b_hsa-miR-19a, SOCS3<-hsa-miR-203
Dilated cardiomyopathy	12	13.0435	0.0228665	0.0563296	7	hsa-let-7b, hsa-miR-1, hsa-miR-124, hsa-miR-16, hsa-miR-182, hsa-miR-21, hsa-miR-96	ACTG1<-hsa-let-7b, ADCY6<-hsa-miR-96_hsa-miR-182, CACNA2D1<-hsa-miR-16, IGF1<-hsa-miR-1, ITGA2<-hsa-miR-16, ITGB1<-hsa-miR-124, ITGB4<-hsa-miR-1, TGFB1<-hsa-miR-21, TPM1<-hsa-miR-21_hsa-miR-1, TPM2<-hsa-miR-1, TPM3<-hsa-miR-16_hsa-miR-1, TPM4<-hsa-miR-1
Dorso-ventral axis formation	5	20	0.0253813	0.0610361	10	hsa-let-7a, hsa-miR-1, hsa-miR-143, hsa-miR-155, hsa-miR-16, hsa-miR-23b, hsa-miR-27b, hsa-miR-30a, hsa-miR-34a, hsa-miR-7	EGFR<-hsa-miR-7_hsa-miR-16_hsa-miR-1, ETS1<-hsa-miR-155, KRAS<-hsa-let-7a_hsa-miR-143, NOTCH1<-hsa-miR-34a_hsa-miR-23b_hsa-miR-27b_hsa-miR-30a, NOTCH2<-hsa-miR-16_hsa-miR-1
Starch and sucrose metabolism	8	15.0943	0.0269786	0.0633685	7	hsa-let-7b, hsa-miR-1, hsa-miR-122, hsa-miR-124, hsa-miR-125b, hsa-miR-15a, hsa-miR-16	GYS1<-hsa-miR-122_hsa-let-7b, PGM1<-hsa-miR-124, PGM2<-hsa-miR-1, UGDH<-hsa-miR-15a_hsa-miR-16, UGP2<-hsa-miR-15a_hsa-miR-16, UGT2B15<-hsa-miR-125b, UGT2B17<-hsa-miR-125b, UGT2B28<-hsa-miR-125b
Amyotrophic lateral sclerosis (ALS)	8	15.0943	0.0269786	0.0633685	9	hsa-miR-124, hsa-miR-133a, hsa-miR-143, hsa-miR-15a, hsa-miR-15b, hsa-miR-16, hsa-miR-181b, hsa-miR-21, hsa-miR-34a	APAF1<-hsa-miR-21, BCL2<-hsa-miR-15a_hsa-miR-16_hsa-miR-34a_hsa-miR-15b, CASP9<-hsa-miR-133a, CHP<-hsa-miR-124, DAXX<-hsa-miR-21, GRIA2<-hsa-miR-181b, MAPK12<-hsa-miR-143, MAPK14<-hsa-miR-124
Hypertrophic cardiomyopathy (HCM)	11	12.9412	0.0301842	0.0677468	5	hsa-let-7b, hsa-miR-1, hsa-miR-124, hsa-miR-16, hsa-miR-21	ACTG1<-hsa-let-7b, CACNA2D1<-hsa-miR-16, IGF1<-hsa-miR-1, ITGA2<-hsa-miR-16, ITGB1<-hsa-miR-124, ITGB4<-hsa-miR-1, TGFB1<-hsa-miR-21, TPM1<-hsa-miR-21_hsa-miR-1, TPM2<-hsa-miR-1, TPM3<-hsa-miR-16_hsa-miR-1, TPM4<-hsa-miR-1
Ascorbate and aldarate metabolism	5	19.2308	0.0297086	0.0681948	4	hsa-miR-124, hsa-miR-125b, hsa-miR-15a, hsa-miR-16	ALDH9A1<-hsa-miR-124, UGDH<-hsa-miR-15a_hsa-miR-16, UGT2B15<-hsa-miR-125b, UGT2B17<-hsa-miR-125b, UGT2B28<-hsa-miR-125b
Amino sugar and nucleotide sugar metabolism	7	15.5556	0.0323457	0.0710199	4	hsa-miR-1, hsa-miR-124, hsa-miR-15a, hsa-miR-16	GFPT1<-hsa-miR-16, GNPDA2<-hsa-miR-1, GNPNAT1<-hsa-miR-1, PGM1<-hsa-miR-124, PGM2<-hsa-miR-1, UGDH<-hsa-miR-15a_hsa-miR-16, UGP2<-hsa-miR-15a_hsa-miR-16
Vibrio cholerae infection	8	14.2857	0.0361949	0.0777806	6	hsa-let-7b, hsa-miR-1, hsa-miR-124, hsa-miR-133a, hsa-miR-155, hsa-miR-16	ACTG1<-hsa-let-7b, ATP6V0A1<-hsa-let-7b_hsa-miR-1, ATP6V1C1<-hsa-miR-155, ATP6V1F<-hsa-let-7b, KCNQ1<-hsa-miR-133a_hsa-miR-1, SLC12A2<-hsa-miR-16, TJP2<-hsa-miR-124
Gap junction	11	12.2222	0.0434281	0.09138	10	hsa-let-7a, hsa-let-7b, hsa-miR-1, hsa-miR-124, hsa-miR-143, hsa-miR-16, hsa-miR-182, hsa-miR-206, hsa-miR-7, hsa-miR-96	ADCY6<-hsa-miR-96_hsa-miR-182, CSNK1D<-hsa-let-7b, EGFR<-hsa-miR-7_hsa-miR-16_hsa-miR-1, GJA1<-hsa-miR-1_hsa-miR-206, GNAI3<-hsa-miR-124, KRAS<-hsa-let-7a_hsa-miR-143, MAPK7<-hsa-miR-143, NRAS<-hsa-let-7a, RAF1<-hsa-miR-7
Toll-like receptor signaling pathway	12	11.7647	0.0461408	0.0932045	9	hsa-let-7i, hsa-miR-124, hsa-miR-143, hsa-miR-146a, hsa-miR-15a, hsa-miR-16, hsa-miR-17, hsa-miR-29b, hsa-miR-370	IRAK1<-hsa-miR-146a, JUN<-hsa-miR-15a_hsa-miR-16, MAP3K8<-hsa-miR-370, MAPK12<-hsa-miR-143, MAPK14<-hsa-miR-124, MAPK9<-hsa-miR-17, PIK3R1<-hsa-miR-29b, RELA<-hsa-miR-124, TLR4<-hsa-let-7i, TRAF6<-hsa-miR-146a
Pentose and glucuronate interconversions	5	17.2414	0.0453525	0.0934816	3	hsa-miR-125b, hsa-miR-15a, hsa-miR-16	UGDH<-hsa-miR-15a_hsa-miR-16, UGP2<-hsa-miR-15a_hsa-miR-16, UGT2B15<-hsa-miR-125b, UGT2B17<-hsa-miR-125b, UGT2B28<-hsa-miR-125b
Thyroid cancer	5	17.2414	0.0453525	0.0934816	9	hsa-let-7a, hsa-let-7b, hsa-miR-1, hsa-miR-143, hsa-miR-155, hsa-miR-16, hsa-miR-195, hsa-miR-34a, hsa-miR-424	CCND1<-hsa-let-7b_hsa-miR-195_hsa-miR-424_hsa-miR-16_hsa-miR-34a, CTNNB1<-hsa-miR-155, KRAS<-hsa-let-7a_hsa-miR-143, NRAS<-hsa-let-7a, TPM3<-hsa-miR-16_hsa-miR-1
Ubiquitin mediated proteolysis	15	10.7914	0.0535753	0.1061	11	hsa-let-7b, hsa-miR-106b, hsa-miR-125b, hsa-miR-146a, hsa-miR-155, hsa-miR-16, hsa-miR-19a, hsa-miR-19b, hsa-miR-203, hsa-miR-30e, hsa-miR-338-3p	ANAPC1<-hsa-let-7b, BRCA1<-hsa-miR-146a, CDC34<-hsa-let-7b, CUL4B<-hsa-miR-155, ITCH<-hsa-miR-106b, NEDD4<-hsa-let-7b, SOCS1<-hsa-miR-19b_hsa-miR-19a, SOCS3<-hsa-miR-203, TRAF6<-hsa-miR-146a, TRIM32<-hsa-miR-155, UBE2I<-hsa-miR-125b_hsa-miR-30e, UBE2J1<-hsa-miR-155, UBE2Q1<-hsa-miR-338-3p, UBE2S<-hsa-miR-16, UBE4A<-hsa-miR-16
Malaria	7	13.7255	0.0582086	0.113059	7	hsa-let-7b, hsa-let-7i, hsa-miR-1, hsa-miR-126, hsa-miR-155, hsa-miR-21, hsa-miR-30a*	LRP1<-hsa-miR-1, MET<-hsa-miR-1_hsa-miR-155, SDC4<-hsa-miR-1, TGFB1<-hsa-miR-21, THBS1<-hsa-miR-30a*_hsa-let-7b_hsa-miR-1, TLR4<-hsa-let-7i, VCAM1<-hsa-miR-126
NOD-like receptor signaling pathway	8	12.9032	0.0604928	0.115279	6	hsa-miR-124, hsa-miR-143, hsa-miR-146a, hsa-miR-15a, hsa-miR-16, hsa-miR-17	CARD8<-hsa-miR-16_hsa-miR-15a, MAPK12<-hsa-miR-143, MAPK14<-hsa-miR-124, MAPK9<-hsa-miR-17, RELA<-hsa-miR-124, TRAF6<-hsa-miR-146a
B cell receptor signaling pathway	9	12	0.0704138	0.1317	7	hsa-let-7a, hsa-miR-124, hsa-miR-143, hsa-miR-15a, hsa-miR-16, hsa-miR-29b, hsa-miR-7	CHP<-hsa-miR-124, JUN<-hsa-miR-15a_hsa-miR-16, KRAS<-hsa-let-7a_hsa-miR-143, NFATC1<-hsa-miR-124, NRAS<-hsa-let-7a, PIK3R1<-hsa-miR-29b, RAF1<-hsa-miR-7, RELA<-hsa-miR-124
Tight junction	14	10.4478	0.075439	0.13606	9	hsa-let-7a, hsa-let-7b, hsa-miR-124, hsa-miR-143, hsa-miR-155, hsa-miR-19a, hsa-miR-21, hsa-miR-214, hsa-miR-29b	ACTG1<-hsa-let-7b, CDC42<-hsa-miR-29b, CDK4<-hsa-miR-124, CLDN1<-hsa-miR-155, CTNNB1<-hsa-miR-155, F11R<-hsa-miR-124, GNAI3<-hsa-miR-124, KRAS<-hsa-let-7a_hsa-miR-143, MYH9<-hsa-miR-124, NRAS<-hsa-let-7a, PRKCI<-hsa-miR-155, PTEN<-hsa-miR-19a_hsa-miR-214_hsa-miR-21, RHOA<-hsa-miR-155, TJP2<-hsa-miR-124
Arrhythmogenic right ventricular cardiomyopathy (ARVC)	9	11.8421	0.0752823	0.138246	6	hsa-let-7b, hsa-miR-1, hsa-miR-124, hsa-miR-155, hsa-miR-16, hsa-miR-206	ACTG1<-hsa-let-7b, CACNA2D1<-hsa-miR-16, CTNNB1<-hsa-miR-155, DSG2<-hsa-miR-155, DSP<-hsa-let-7b, GJA1<-hsa-miR-1_hsa-miR-206, ITGA2<-hsa-miR-16, ITGB1<-hsa-miR-124, ITGB4<-hsa-miR-1
Base excision repair	5	14.7059	0.0805563	0.14274	4	hsa-let-7b, hsa-miR-124, hsa-miR-141, hsa-miR-155	APEX2<-hsa-miR-124, HMGB1<-hsa-miR-141, POLD2<-hsa-let-7b, POLE3<-hsa-miR-155, POLE4<-hsa-miR-155
GnRH signaling pathway	11	10.8911	0.0853855	0.148689	11	hsa-let-7a, hsa-miR-1, hsa-miR-124, hsa-miR-143, hsa-miR-15a, hsa-miR-16, hsa-miR-17, hsa-miR-182, hsa-miR-29b, hsa-miR-7, hsa-miR-96	ADCY6<-hsa-miR-96_hsa-miR-182, CDC42<-hsa-miR-29b, EGFR<-hsa-miR-7_hsa-miR-16_hsa-miR-1, JUN<-hsa-miR-15a_hsa-miR-16, KRAS<-hsa-let-7a_hsa-miR-143, MAPK12<-hsa-miR-143, MAPK14<-hsa-miR-124, MAPK7<-hsa-miR-143, MAPK9<-hsa-miR-17, NRAS<-hsa-let-7a, RAF1<-hsa-miR-7
Adipocytokine signaling pathway	8	11.9403	0.0871021	0.149107	7	hsa-miR-124, hsa-miR-126, hsa-miR-145, hsa-miR-17, hsa-miR-203, hsa-miR-375, hsa-miR-7	ADIPOR2<-hsa-miR-124_hsa-miR-375, IRS1<-hsa-miR-145_hsa-miR-7_hsa-miR-126, IRS2<-hsa-miR-7, JAK2<-hsa-miR-375, MAPK9<-hsa-miR-17, RELA<-hsa-miR-124, SOCS3<-hsa-miR-203
Melanogenesis	11	10.7843	0.0901294	0.151718	9	hsa-let-7a, hsa-miR-124, hsa-miR-143, hsa-miR-155, hsa-miR-182, hsa-miR-222, hsa-miR-34b*, hsa-miR-7, hsa-miR-96	ADCY6<-hsa-miR-96_hsa-miR-182, CREB1<-hsa-miR-34b*, CREB3L2<-hsa-miR-124, CTNNB1<-hsa-miR-155, DVL2<-hsa-miR-124, GNAI3<-hsa-miR-124, KIT<-hsa-miR-222, KRAS<-hsa-let-7a_hsa-miR-143, MITF<-hsa-miR-96_hsa-miR-182, NRAS<-hsa-let-7a, RAF1<-hsa-miR-7
DNA replication	5	13.8889	0.097785	0.161906	5	hsa-let-7b, hsa-miR-1, hsa-miR-155, hsa-miR-15a, hsa-miR-16	POLA2<-hsa-miR-1, POLD2<-hsa-let-7b, POLE3<-hsa-miR-155, POLE4<-hsa-miR-155, PRIM1<-hsa-miR-15a_hsa-miR-16_hsa-let-7b
Notch signaling pathway	6	12.766	0.10095	0.16445	8	hsa-miR-1, hsa-miR-124, hsa-miR-16, hsa-miR-23a, hsa-miR-23b, hsa-miR-27b, hsa-miR-30a, hsa-miR-34a	DVL2<-hsa-miR-124, HES1<-hsa-miR-23a, NOTCH1<-hsa-miR-34a_hsa-miR-23b_hsa-miR-27b_hsa-miR-30a, NOTCH2<-hsa-miR-16_hsa-miR-1
Long-term depression	8	11.4286	0.105885	0.169752	7	hsa-let-7a, hsa-miR-1, hsa-miR-124, hsa-miR-143, hsa-miR-155, hsa-miR-181b, hsa-miR-7	GNA13<-hsa-miR-155, GNAI3<-hsa-miR-124, GRIA2<-hsa-miR-181b, IGF1<-hsa-miR-1, KRAS<-hsa-let-7a_hsa-miR-143, NRAS<-hsa-let-7a, RAF1<-hsa-miR-7
ECM-receptor interaction	9	10.7143	0.121484	0.191717	7	hsa-let-7b, hsa-miR-1, hsa-miR-124, hsa-miR-16, hsa-miR-199b-5p, hsa-miR-218, hsa-miR-30a*	AGRN<-hsa-miR-1, ITGA2<-hsa-miR-16, ITGB1<-hsa-miR-124, ITGB4<-hsa-miR-1, LAMB3<-hsa-miR-218, LAMC1<-hsa-miR-124_hsa-miR-16, LAMC2<-hsa-miR-199b-5p, SDC4<-hsa-miR-1, THBS1<-hsa-miR-30a*_hsa-let-7b_hsa-miR-1
mTOR signaling pathway	6	11.5385	0.144756	0.224928	6	hsa-miR-1, hsa-miR-124, hsa-miR-126, hsa-miR-155, hsa-miR-16, hsa-miR-29b	EIF4E<-hsa-miR-16, IGF1<-hsa-miR-1, PGF<-hsa-miR-124, PIK3R1<-hsa-miR-29b, RHEB<-hsa-miR-155, VEGFA<-hsa-miR-126
Aminoacyl-tRNA biosynthesis	5	12.1951	0.148054	0.226567	3	hsa-let-7b, hsa-miR-155, hsa-miR-16	HARS<-hsa-miR-16, HARS2<-hsa-miR-16, MARS2<-hsa-let-7b, NARS<-hsa-miR-155, RARS<-hsa-miR-16
Chemokine signaling pathway	17	8.99471	0.153015	0.230664	14	hsa-let-7a, hsa-miR-1, hsa-miR-124, hsa-miR-143, hsa-miR-146a, hsa-miR-155, hsa-miR-182, hsa-miR-193a-3p, hsa-miR-23a, hsa-miR-29b, hsa-miR-375, hsa-miR-377, hsa-miR-7, hsa-miR-96	ADCY6<-hsa-miR-96_hsa-miR-182, CDC42<-hsa-miR-29b, CXCL12<-hsa-miR-23a, CXCR4<-hsa-miR-146a, GNAI3<-hsa-miR-124, GNG10<-hsa-miR-124, JAK2<-hsa-miR-375, KRAS<-hsa-let-7a_hsa-miR-143, NRAS<-hsa-let-7a, PAK1<-hsa-miR-377_hsa-miR-7, PIK3R1<-hsa-miR-29b, PREX1<-hsa-miR-1, PTK2<-hsa-miR-193a-3p, RAF1<-hsa-miR-7, RELA<-hsa-miR-124, RHOA<-hsa-miR-155
Fatty acid metabolism	5	11.9048	0.159223	0.233066	1	hsa-miR-124	ACAA2<-hsa-miR-124, ALDH9A1<-hsa-miR-124, HADHB<-hsa-miR-124, PECI<-hsa-miR-124
Aldosterone-regulated sodium reabsorption	5	11.9048	0.159223	0.233066	7	hsa-let-7a, hsa-miR-1, hsa-miR-126, hsa-miR-143, hsa-miR-145, hsa-miR-29b, hsa-miR-7	IGF1<-hsa-miR-1, IRS1<-hsa-miR-145_hsa-miR-7_hsa-miR-126, IRS2<-hsa-miR-7, KRAS<-hsa-let-7a_hsa-miR-143, PIK3R1<-hsa-miR-29b
Oocyte meiosis	11	9.64912	0.159145	0.236378	10	hsa-let-7b, hsa-miR-1, hsa-miR-124, hsa-miR-143, hsa-miR-150, hsa-miR-15b, hsa-miR-16, hsa-miR-182, hsa-miR-424, hsa-miR-96	ADCY6<-hsa-miR-96_hsa-miR-182, ANAPC1<-hsa-let-7b, CCNE1<-hsa-miR-424_hsa-miR-16_hsa-miR-150_hsa-miR-15b, CHP<-hsa-miR-124, IGF1<-hsa-miR-1, MAD2L2<-hsa-miR-124, MAPK12<-hsa-miR-143, PLK1<-hsa-miR-16, PPP2R5C<-hsa-miR-16, YWHAQ<-hsa-miR-1
Porphyrin and chlorophyll metabolism	5	11.6279	0.170724	0.24633	3	hsa-miR-1, hsa-miR-125b, hsa-miR-16	CPOX<-hsa-miR-1, HMOX1<-hsa-miR-16, UGT2B15<-hsa-miR-125b, UGT2B17<-hsa-miR-125b, UGT2B28<-hsa-miR-125b
Basal cell carcinoma	6	10.9091	0.174574	0.248338	7	hsa-miR-124, hsa-miR-125b, hsa-miR-135a, hsa-miR-135b, hsa-miR-155, hsa-miR-324-5p, hsa-miR-378*	APC<-hsa-miR-135a_hsa-miR-135b, CTNNB1<-hsa-miR-155, DVL2<-hsa-miR-124, GLI1<-hsa-miR-324-5p, SMO<-hsa-miR-324-5p_hsa-miR-125b, SUFU<-hsa-miR-378*
Steroid hormone biosynthesis	6	10.7143	0.185036	0.25255	4	hsa-miR-124, hsa-miR-125b, hsa-miR-155, hsa-miR-27b	CYP1A1<-hsa-miR-125b, CYP1B1<-hsa-miR-124_hsa-miR-27b, HSD17B12<-hsa-miR-155, UGT2B15<-hsa-miR-125b, UGT2B17<-hsa-miR-125b, UGT2B28<-hsa-miR-125b
Amoebiasis	10	9.52381	0.184	0.254575	9	hsa-let-7i, hsa-miR-124, hsa-miR-155, hsa-miR-16, hsa-miR-193a-3p, hsa-miR-199b-5p, hsa-miR-21, hsa-miR-218, hsa-miR-29b	LAMB3<-hsa-miR-218, LAMC1<-hsa-miR-124_hsa-miR-16, LAMC2<-hsa-miR-199b-5p, PIK3R1<-hsa-miR-29b, PTK2<-hsa-miR-193a-3p, RAB5C<-hsa-miR-155, RELA<-hsa-miR-124, SERPINB6<-hsa-miR-124, TGFB1<-hsa-miR-21, TLR4<-hsa-let-7i
Valine, leucine and isoleucine degradation	5	11.3636	0.182537	0.256059	2	hsa-miR-1, hsa-miR-124	ACAA2<-hsa-miR-124, ALDH9A1<-hsa-miR-124, BCKDHB<-hsa-miR-1, HADHB<-hsa-miR-124
Nucleotide excision repair	5	11.3636	0.182537	0.256059	4	hsa-let-7b, hsa-miR-155, hsa-miR-15a, hsa-miR-16	CUL4B<-hsa-miR-155, GTF2H1<-hsa-miR-15a_hsa-miR-16, POLD2<-hsa-let-7b, POLE3<-hsa-miR-155, POLE4<-hsa-miR-155
Vasopressin-regulated water reabsorption	5	11.3636	0.182537	0.256059	6	hsa-miR-124, hsa-miR-155, hsa-miR-16, hsa-miR-182, hsa-miR-34b*, hsa-miR-96	ADCY6<-hsa-miR-96_hsa-miR-182, ARHGDIA<-hsa-miR-16, CREB1<-hsa-miR-34b*, CREB3L2<-hsa-miR-124, RAB5C<-hsa-miR-155
Phagosome	14	8.9172	0.190539	0.256593	7	hsa-let-7b, hsa-let-7i, hsa-miR-1, hsa-miR-124, hsa-miR-155, hsa-miR-16, hsa-miR-30a*	ACTG1<-hsa-let-7b, ATP6V0A1<-hsa-let-7b_hsa-miR-1, ATP6V1C1<-hsa-miR-155, ATP6V1F<-hsa-let-7b, ITGA2<-hsa-miR-16, ITGB1<-hsa-miR-124, MRC2<-hsa-miR-1, RAB5C<-hsa-miR-155, THBS1<-hsa-miR-30a*_hsa-let-7b_hsa-miR-1, TLR4<-hsa-let-7i, VAMP3<-hsa-miR-124_hsa-miR-155
Lysine degradation	5	10.8696	0.207018	0.271543	2	hsa-miR-1, hsa-miR-124	ALDH9A1<-hsa-miR-124, EHMT1<-hsa-miR-1, EHMT2<-hsa-miR-1, PLOD3<-hsa-miR-124
Fc gamma R-mediated phagocytosis	9	9.47368	0.204663	0.271986	7	hsa-miR-124, hsa-miR-155, hsa-miR-16, hsa-miR-21, hsa-miR-29b, hsa-miR-377, hsa-miR-7	ARPC1B<-hsa-miR-124, CDC42<-hsa-miR-29b, CFL2<-hsa-miR-21_hsa-miR-16, DNM2<-hsa-miR-124, GSN<-hsa-miR-124, MYO10<-hsa-miR-124_hsa-miR-155, PAK1<-hsa-miR-377_hsa-miR-7, PIK3R1<-hsa-miR-29b, RAF1<-hsa-miR-7
Intestinal immune network for IgA production	5	10	0.258819	0.335138	5	hsa-miR-101, hsa-miR-125b, hsa-miR-146a, hsa-miR-21, hsa-miR-23a	CXCL12<-hsa-miR-23a, CXCR4<-hsa-miR-146a, ICOS<-hsa-miR-101, PIGR<-hsa-miR-125b, TGFB1<-hsa-miR-21
Glycolysis / Gluconeogenesis	6	9.375	0.2762	0.353116	6	hsa-miR-1, hsa-miR-124, hsa-miR-133a, hsa-miR-133b, hsa-miR-15a, hsa-miR-16	ADPGK<-hsa-miR-1, ALDH9A1<-hsa-miR-124, PGM1<-hsa-miR-124, PGM2<-hsa-miR-1, PKM2<-hsa-miR-133a_hsa-miR-133b, TPI1<-hsa-miR-15a_hsa-miR-16
Fc epsilon RI signaling pathway	7	8.86076	0.299784	0.378477	6	hsa-let-7a, hsa-miR-124, hsa-miR-143, hsa-miR-17, hsa-miR-29b, hsa-miR-7	KRAS<-hsa-let-7a_hsa-miR-143, MAPK12<-hsa-miR-143, MAPK14<-hsa-miR-124, MAPK9<-hsa-miR-17, NRAS<-hsa-let-7a, PIK3R1<-hsa-miR-29b, RAF1<-hsa-miR-7
Hedgehog signaling pathway	5	8.92857	0.341073	0.425288	5	hsa-let-7b, hsa-miR-125b, hsa-miR-155, hsa-miR-324-5p, hsa-miR-378*	CSNK1D<-hsa-let-7b, GLI1<-hsa-miR-324-5p, RAB23<-hsa-miR-155, SMO<-hsa-miR-324-5p_hsa-miR-125b, SUFU<-hsa-miR-378*
Long-term potentiation	6	8.57143	0.350241	0.431394	5	hsa-let-7a, hsa-miR-124, hsa-miR-143, hsa-miR-181b, hsa-miR-7	CHP<-hsa-miR-124, GRIA2<-hsa-miR-181b, KRAS<-hsa-let-7a_hsa-miR-143, NRAS<-hsa-let-7a, RAF1<-hsa-miR-7
Metabolism of xenobiotics by cytochrome P450	6	8.4507	0.362799	0.441478	4	hsa-miR-124, hsa-miR-125b, hsa-miR-16, hsa-miR-27b	CYP1A1<-hsa-miR-125b, CYP1B1<-hsa-miR-124_hsa-miR-27b, GSTM4<-hsa-miR-16, UGT2B15<-hsa-miR-125b, UGT2B17<-hsa-miR-125b, UGT2B28<-hsa-miR-125b
RIG-I-like receptor signaling pathway	6	8.4507	0.362799	0.441478	4	hsa-miR-124, hsa-miR-143, hsa-miR-146a, hsa-miR-17	MAPK12<-hsa-miR-143, MAPK14<-hsa-miR-124, MAPK9<-hsa-miR-17, RELA<-hsa-miR-124, TRAF6<-hsa-miR-146a
Viral myocarditis	6	8	0.413144	0.496757	8	hsa-let-7b, hsa-miR-124, hsa-miR-133a, hsa-miR-16, hsa-miR-195, hsa-miR-203, hsa-miR-34a, hsa-miR-424	ABL1<-hsa-miR-203, ACTG1<-hsa-let-7b, CASP9<-hsa-miR-133a, CAV1<-hsa-miR-124, CCND1<-hsa-let-7b_hsa-miR-195_hsa-miR-424_hsa-miR-16_hsa-miR-34a, MYH9<-hsa-miR-124
Natural killer cell mediated cytotoxicity	10	7.29927	0.471056	0.52863	8	hsa-let-7a, hsa-miR-124, hsa-miR-143, hsa-miR-155, hsa-miR-21, hsa-miR-29b, hsa-miR-377, hsa-miR-7	CHP<-hsa-miR-124, FAS<-hsa-miR-21, KRAS<-hsa-let-7a_hsa-miR-143, NFATC1<-hsa-miR-124, NRAS<-hsa-let-7a, PAK1<-hsa-miR-377_hsa-miR-7, PIK3R1<-hsa-miR-29b, RAF1<-hsa-miR-7, TNFRSF10A<-hsa-miR-155
Wnt signaling pathway	11	7.28477	0.467758	0.530827	11	hsa-let-7b, hsa-miR-124, hsa-miR-135a, hsa-miR-135b, hsa-miR-155, hsa-miR-15a, hsa-miR-16, hsa-miR-17, hsa-miR-195, hsa-miR-34a, hsa-miR-424	APC<-hsa-miR-135a_hsa-miR-135b, CCND1<-hsa-let-7b_hsa-miR-195_hsa-miR-424_hsa-miR-16_hsa-miR-34a, CCND3<-hsa-miR-424_hsa-miR-16, CHP<-hsa-miR-124, CTNNB1<-hsa-miR-155, DVL2<-hsa-miR-124, JUN<-hsa-miR-15a_hsa-miR-16, MAPK9<-hsa-miR-17, NFATC1<-hsa-miR-124, PPP2R5C<-hsa-miR-16, RHOA<-hsa-miR-155
Retinol metabolism	5	7.69231	0.466235	0.535111	3	hsa-let-7b, hsa-miR-124, hsa-miR-125b	CYP1A1<-hsa-miR-125b, RDH10<-hsa-miR-124_hsa-let-7b, UGT2B15<-hsa-miR-125b, UGT2B17<-hsa-miR-125b, UGT2B28<-hsa-miR-125b
Glycerophospholipid metabolism	6	7.59494	0.463072	0.537589	4	hsa-let-7b, hsa-miR-1, hsa-miR-155, hsa-miR-16	CDIPT<-hsa-let-7b, GPAM<-hsa-miR-16, GPD2<-hsa-miR-1, LYCAT<-hsa-miR-155, LYPLA2<-hsa-miR-16, PISD<-hsa-miR-16
Lysosome	9	7.43802	0.454679	0.540266	4	hsa-let-7b, hsa-miR-1, hsa-miR-124, hsa-miR-16	ACP2<-hsa-miR-16, AP1M2<-hsa-miR-124, AP3B1<-hsa-miR-1, AP3D1<-hsa-miR-1, ATP6V0A1<-hsa-let-7b_hsa-miR-1, CD164<-hsa-miR-124, CTSC<-hsa-miR-1, IGF2R<-hsa-miR-16, SLC17A5<-hsa-miR-124
Cell adhesion molecules (CAMs)	10	7.35294	0.461623	0.542139	5	hsa-miR-1, hsa-miR-101, hsa-miR-124, hsa-miR-126, hsa-miR-155	CLDN1<-hsa-miR-155, F11R<-hsa-miR-124, ICOS<-hsa-miR-101, ITGB1<-hsa-miR-124, MPZL1<-hsa-miR-155, PTPRF<-hsa-miR-1, SDC4<-hsa-miR-1, VCAM1<-hsa-miR-126
Vascular smooth muscle contraction	8	6.89655	0.5507	0.611217	6	hsa-miR-124, hsa-miR-155, hsa-miR-182, hsa-miR-21, hsa-miR-7, hsa-miR-96	ACTA2<-hsa-miR-21, ADCY6<-hsa-miR-96_hsa-miR-182, AGTR1<-hsa-miR-155, ARHGEF1<-hsa-miR-124, GNA13<-hsa-miR-155, RAF1<-hsa-miR-7, RHOA<-hsa-miR-155
Hematopoietic cell lineage	6	6.81818	0.570355	0.62615	5	hsa-miR-1, hsa-miR-124, hsa-miR-16, hsa-miR-21, hsa-miR-222	ANPEP<-hsa-miR-1, CD59<-hsa-miR-124, IL6R<-hsa-miR-21, ITGA2<-hsa-miR-16, KIT<-hsa-miR-222
Gastric acid secretion	5	6.75676	0.583337	0.633516	5	hsa-miR-1, hsa-miR-124, hsa-miR-133a, hsa-miR-182, hsa-miR-96	ADCY6<-hsa-miR-96_hsa-miR-182, GNAI3<-hsa-miR-124, KCNJ2<-hsa-miR-1, KCNQ1<-hsa-miR-133a_hsa-miR-1
Cardiac muscle contraction	5	6.25	0.653188	0.70183	3	hsa-miR-1, hsa-miR-16, hsa-miR-21	CACNA2D1<-hsa-miR-16, TPM1<-hsa-miR-21_hsa-miR-1, TPM2<-hsa-miR-1, TPM3<-hsa-miR-16_hsa-miR-1, TPM4<-hsa-miR-1
Spliceosome	8	6.25	0.66346	0.705363	5	hsa-miR-1, hsa-miR-125b, hsa-miR-15a, hsa-miR-16, hsa-miR-21	DDX5<-hsa-miR-1, DHX15<-hsa-miR-1, HNRNPK<-hsa-miR-21, HSPA1A<-hsa-miR-15a_hsa-miR-16, HSPA1B<-hsa-miR-16, RBM8A<-hsa-miR-125b, SFRS9<-hsa-miR-1
Jak-STAT signaling pathway	9	5.80645	0.749755	0.788805	12	hsa-let-7b, hsa-miR-1, hsa-miR-16, hsa-miR-195, hsa-miR-19a, hsa-miR-19b, hsa-miR-203, hsa-miR-21, hsa-miR-29b, hsa-miR-34a, hsa-miR-375, hsa-miR-424	CCND1<-hsa-let-7b_hsa-miR-195_hsa-miR-424_hsa-miR-16_hsa-miR-34a, CCND3<-hsa-miR-424_hsa-miR-16, IL6R<-hsa-miR-21, JAK2<-hsa-miR-375, PIK3R1<-hsa-miR-29b, PIM1<-hsa-miR-1, SOCS1<-hsa-miR-19b_hsa-miR-19a, SOCS3<-hsa-miR-203, SOCS5<-hsa-miR-21
Alzheimer's disease	9	5.35714	0.827544	0.835819	12	hsa-miR-1, hsa-miR-106a, hsa-miR-107, hsa-miR-124, hsa-miR-125b, hsa-miR-133a, hsa-miR-155, hsa-miR-15a, hsa-miR-19b, hsa-miR-21, hsa-miR-29b, hsa-miR-9	APAF1<-hsa-miR-21, APP<-hsa-miR-106a, BACE1<-hsa-miR-107_hsa-miR-29b_hsa-miR-9_hsa-miR-15a_hsa-miR-19b, CASP7<-hsa-miR-125b, CASP9<-hsa-miR-133a, CHP<-hsa-miR-124, FAS<-hsa-miR-21, LPL<-hsa-miR-155, LRP1<-hsa-miR-1
Metabolic pathways	71	6.33929	0.806878	0.840151	13	hsa-let-7b, hsa-miR-1, hsa-miR-124, hsa-miR-125b, hsa-miR-133a, hsa-miR-133b, hsa-miR-155, hsa-miR-15a, hsa-miR-16, hsa-miR-192, hsa-miR-21, hsa-miR-29b, hsa-miR-30a	ACAA2<-hsa-miR-124, ADPGK<-hsa-miR-1, ADSS<-hsa-miR-16, AGMAT<-hsa-miR-1, AK1<-hsa-miR-30a, AK2<-hsa-miR-124, ALDH9A1<-hsa-miR-124, ANPEP<-hsa-miR-1, ATP6V0A1<-hsa-let-7b_hsa-miR-1, ATP6V1C1<-hsa-miR-155, ATP6V1F<-hsa-let-7b, B3GALT4<-hsa-miR-125b, B4GALT1<-hsa-miR-124, BCKDHB<-hsa-miR-1, CDIPT<-hsa-let-7b, CHSY1<-hsa-miR-1_hsa-miR-124, CPOX<-hsa-miR-1, CYP51A1<-hsa-miR-155, DCTD<-hsa-miR-124, DH…
Huntington's disease	10	5.43478	0.824528	0.841185	10	hsa-let-7b, hsa-miR-1, hsa-miR-124, hsa-miR-133a, hsa-miR-155, hsa-miR-21, hsa-miR-29b, hsa-miR-30a, hsa-miR-34b*, hsa-miR-9	APAF1<-hsa-miR-21, BDNF<-hsa-miR-1_hsa-miR-30a, CASP9<-hsa-miR-133a, CREB1<-hsa-miR-34b*, CREB3L2<-hsa-miR-124, POLR2C<-hsa-let-7b, POLR2K<-hsa-miR-1, RCOR1<-hsa-miR-155, REST<-hsa-miR-9, SP1<-hsa-miR-124_hsa-miR-29b
Cytokine-cytokine receptor interaction	15	5.66038	0.822587	0.847768	11	hsa-miR-1, hsa-miR-124, hsa-miR-126, hsa-miR-146a, hsa-miR-155, hsa-miR-16, hsa-miR-21, hsa-miR-222, hsa-miR-23a, hsa-miR-26a, hsa-miR-7	BMPR2<-hsa-miR-21, CXCL12<-hsa-miR-23a, CXCR4<-hsa-miR-146a, EGFR<-hsa-miR-7_hsa-miR-16_hsa-miR-1, FAS<-hsa-miR-21, IL6R<-hsa-miR-21, KIT<-hsa-miR-222, MET<-hsa-miR-1_hsa-miR-155, TGFB1<-hsa-miR-21, TGFBR2<-hsa-miR-26a_hsa-miR-21, TNFRSF10A<-hsa-miR-155, TNFRSF21<-hsa-miR-124, TNFSF9<-hsa-miR-16, VEGFA<-hsa-miR-126
Calcium signaling pathway	7	3.93258	0.967017	0.967017	9	hsa-miR-1, hsa-miR-124, hsa-miR-125a-5p, hsa-miR-125b, hsa-miR-150, hsa-miR-155, hsa-miR-15a, hsa-miR-16, hsa-miR-7	AGTR1<-hsa-miR-155, CHP<-hsa-miR-124, EGFR<-hsa-miR-7_hsa-miR-16_hsa-miR-1, ERBB2<-hsa-miR-125a-5p_hsa-miR-125b, ERBB3<-hsa-miR-125a-5p_hsa-miR-125b, P2RX7<-hsa-miR-150, PHKB<-hsa-miR-15a_hsa-miR-16
aSymbol “<-“ indicates the “target gene <- miRNAs” relationship
